# Supplementary material for: Comparative Transcriptome and DNA Methylation Analysis of Phenotypic Plasticity in the Pacific Abalone (Haliotis discus hannai)
Source: Front Physiol. 2021 Jun 29;12:683499. doi: 10.3389/fphys.2021.683499 (PMC8277243; doi:10.3389/fphys.2021.683499)
Supplement: Supplementary file 1 [file Table_1.XLSX]

## Sheet: CNN_CNS.DEGs
Table S1. The DEGs in CNN vs CNS derived from Deseq2 R packages.
GeneID	baseMean	log2FoldChange	lfcSE	stat	pvalue	padj
HDH_T00515	299.355	5.09201	0.412837	12.3342	5.92779e-35	3.1032e-31
HDH_T22744	895.057	-2.45803	0.229876	-10.6929	1.09893e-26	2.87645e-23
HDH_T23352	137.924	-3.86914	0.433087	-8.93387	4.11377e-19	7.17853e-16
HDH_T09554	141.89	-4.42328	0.532524	-8.30626	9.87619e-17	1.29255e-13
HDH_T21207	119.722	-4.64745	0.565093	-8.22422	1.96457e-16	2.05691e-13
HDH_T24369	320.977	-3.67174	0.496093	-7.4013	1.34858e-13	1.17663e-10
HDH_T09470	363.256	2.06614	0.281609	7.3369	2.18592e-13	1.63475e-10
HDH_T29165	187.325	-4.11534	0.571238	-7.20425	5.83646e-13	3.81923e-10
HDH_T07636	136.403	-4.14139	0.598048	-6.92485	4.36452e-12	2.53869e-09
HDH_T20118	50.4721	-3.54892	0.514981	-6.89136	5.52618e-12	2.89295e-09
HDH_T03425	50.3524	-3.41704	0.502663	-6.79787	1.06177e-11	5.05306e-09
HDH_T08855	61.5149	-3.48009	0.514711	-6.76126	1.36799e-11	5.96784e-09
HDH_T19658	189.804	-4.14688	0.619515	-6.69375	2.17516e-11	8.75921e-09
HDH_T24923	249.304	-4.19382	0.63192	-6.63662	3.20952e-11	1.20013e-08
HDH_T29546	38.8432	-8.58777	1.30708	-6.57018	5.02556e-11	1.75392e-08
HDH_T15081	865.717	1.71281	0.261263	6.55589	5.53093e-11	1.80965e-08
HDH_T31107	60.7729	-3.73913	0.584963	-6.39207	1.63652e-10	5.03952e-08
HDH_T29547	39.4214	-8.60659	1.35227	-6.36454	1.95878e-10	5.69679e-08
HDH_T26362	79.9652	-4.90187	0.778181	-6.29914	2.99297e-10	8.24641e-08
HDH_T12724	336.039	3.13323	0.500448	6.26085	3.82878e-10	1.00218e-07
HDH_T12970	110.633	-3.46556	0.558122	-6.20933	5.3212e-10	1.3265e-07
HDH_T26731	47.259	-6.07764	0.990933	-6.13325	8.60998e-10	2.04878e-07
HDH_T14885	255.102	2.89599	0.476124	6.08243	1.18378e-09	2.69439e-07
HDH_T15745	40.2029	-3.70321	0.609753	-6.07329	1.25314e-09	2.73341e-07
HDH_T23881	40.0059	-8.63185	1.44789	-5.96169	2.49642e-09	5.02646e-07
HDH_T09517	46.6947	-5.56528	0.932806	-5.96617	2.42889e-09	5.02646e-07
HDH_T29137	73.3602	2.19576	0.381952	5.74879	8.98837e-09	1.74274e-06
HDH_T23540	104.793	2.54761	0.444521	5.73113	9.97645e-09	1.86524e-06
HDH_T27968	90.6472	-3.44449	0.609275	-5.65343	1.57273e-08	2.83905e-06
HDH_T11636	193.552	-3.97791	0.714779	-5.56523	2.61809e-08	4.5117e-06
HDH_T04645	62.9994	-2.44977	0.440472	-5.56169	2.67169e-08	4.5117e-06
HDH_T23867	66.8452	3.27654	0.590067	5.55282	2.81103e-08	4.56599e-06
HDH_T13529	432.99	2.05639	0.370608	5.54868	2.87827e-08	4.56599e-06
HDH_T06154	27.5669	-3.99457	0.725215	-5.50813	3.62674e-08	5.58411e-06
HDH_T05500	2852.97	2.9821	0.547529	5.44648	5.13765e-08	7.68446e-06
HDH_T24251	419.479	1.95198	0.35937	5.43167	5.58295e-08	8.11855e-06
HDH_T14785	30.1024	8.55169	1.58454	5.39694	6.77868e-08	9.51722e-06
HDH_T20937	285.98	-2.55906	0.474468	-5.39354	6.90839e-08	9.51722e-06
HDH_T23145	26.7581	3.9854	0.740262	5.38377	7.29403e-08	9.79084e-06
HDH_T28852	18.709	-7.52974	1.40034	-5.37709	7.56989e-08	9.9071e-06
HDH_T12396	260.332	2.60065	0.486565	5.34492	9.04579e-08	1.15499e-05
HDH_T05987	94.1975	-2.41839	0.460166	-5.25546	1.47652e-07	1.84038e-05
HDH_T10859	352.418	-3.17072	0.609181	-5.2049	1.941e-07	2.36306e-05
HDH_T21398	37.5548	-4.66827	0.89865	-5.19476	2.04981e-07	2.4388e-05
HDH_T07470	231.795	-2.24888	0.434728	-5.17306	2.30289e-07	2.67903e-05
HDH_T20432	31.3303	-3.20045	0.622265	-5.14323	2.70055e-07	3.07334e-05
HDH_T16728	16.5553	-7.35408	1.43351	-5.13012	2.89554e-07	3.22514e-05
HDH_T26326	681.43	-2.42623	0.474011	-5.11852	3.07947e-07	3.35855e-05
HDH_T29023	12.936	7.33239	1.43716	5.102	3.36077e-07	3.59054e-05
HDH_T13919	334.252	-1.82844	0.358825	-5.09563	3.47583e-07	3.63919e-05
HDH_T21402	28.522	-4.66494	0.919565	-5.07299	3.91619e-07	4.01985e-05
HDH_T28342	30.2416	-6.30705	1.25701	-5.01749	5.23508e-07	5.27032e-05
HDH_T27670	29.6512	-3.01109	0.601556	-5.0055	5.57182e-07	5.50349e-05
HDH_T10745	36.5928	-4.49923	0.901219	-4.99238	5.96396e-07	5.78173e-05
HDH_T12926	18.1303	-7.48387	1.50828	-4.96184	6.98277e-07	6.64633e-05
HDH_T17629	74.2068	2.59706	0.524526	4.95125	7.37399e-07	6.89336e-05
HDH_T03657	31.2105	-5.2919	1.07286	-4.9325	8.11844e-07	7.32759e-05
HDH_T21407	770.316	2.27066	0.46015	4.9346	8.03132e-07	7.32759e-05
HDH_T30971	21.7215	-6.77336	1.37565	-4.92376	8.48965e-07	7.53277e-05
HDH_T00954	13.8166	-7.09366	1.44402	-4.91245	8.99459e-07	7.84778e-05
HDH_T18624	28.5977	-6.33877	1.30218	-4.86782	1.12836e-06	9.68356e-05
HDH_T22109	37.0915	-3.20915	0.659711	-4.86447	1.14763e-06	9.69008e-05
HDH_T31343	445.694	2.69602	0.555289	4.85517	1.20281e-06	9.9948e-05
HDH_T07187	91.0977	-2.74839	0.568179	-4.8372	1.3168e-06	0.00010771
HDH_T04344	87.7042	2.61382	0.542507	4.81803	1.44979e-06	0.000116764
HDH_T09093	314.846	1.94556	0.404345	4.81163	1.49702e-06	0.000117855
HDH_T00589	89.1202	3.00654	0.625045	4.81012	1.50836e-06	0.000117855
HDH_T27164	21.7572	6.16026	1.28722	4.7857	1.70389e-06	0.000129661
HDH_T19029	12.2457	-6.91877	1.4459	-4.7851	1.709e-06	0.000129661
HDH_T28349	30.0247	-4.44415	0.933567	-4.7604	1.93208e-06	0.000144492
HDH_T23698	26.8746	-3.34699	0.711555	-4.70377	2.55402e-06	0.000188314
HDH_T10133	202.5	2.31419	0.493021	4.6939	2.6805e-06	0.000194895
HDH_T02830	24.8668	4.30953	0.918817	4.6903	2.72804e-06	0.000195634
HDH_T28780	80.5813	-1.64762	0.352712	-4.6713	2.99298e-06	0.000211733
HDH_T08581	570.179	1.57674	0.33849	4.65815	3.19058e-06	0.000222702
HDH_T25847	56.3654	-3.13252	0.674444	-4.6446	3.40734e-06	0.000234703
HDH_T07133	22.8574	-4.06876	0.876834	-4.64029	3.47919e-06	0.000236539
HDH_T20979	126.172	-1.59953	0.347906	-4.59759	4.27416e-06	0.000286862
HDH_T24794	155.732	1.60026	0.348655	4.58981	4.43653e-06	0.000293991
HDH_T05284	1846.75	1.94502	0.424833	4.57832	4.68715e-06	0.000306716
HDH_T29374	59.418	-3.14455	0.68725	-4.57556	4.74958e-06	0.000306964
HDH_T11766	107.714	2.83808	0.620703	4.57237	4.82247e-06	0.000307874
HDH_T09532	169.649	-3.0759	0.673517	-4.56693	4.94926e-06	0.000312161
HDH_T20271	23.9058	-3.7845	0.834493	-4.53509	5.75784e-06	0.000358837
HDH_T23288	239.945	1.79945	0.397223	4.53007	5.89633e-06	0.000361389
HDH_T11735	83.9257	2.76664	0.610922	4.52863	5.93685e-06	0.000361389
HDH_T30537	657.747	1.12722	0.249909	4.51053	6.46657e-06	0.000389109
HDH_T03793	178.426	1.49972	0.333249	4.50028	6.78625e-06	0.000403705
HDH_T28249	1811.29	1.92846	0.429337	4.49171	7.06533e-06	0.000414558
HDH_T24774	282.701	2.62957	0.585669	4.48986	7.12708e-06	0.000414558
HDH_T23259	43.1284	-2.91626	0.650853	-4.48068	7.44071e-06	0.000428045
HDH_T01606	17.8427	-5.64303	1.26202	-4.47142	7.77017e-06	0.00044214
HDH_T31054	1253.99	1.445	0.324955	4.44675	8.71774e-06	0.000480393
HDH_T11916	252.527	1.94004	0.436224	4.44733	8.69423e-06	0.000480393
HDH_T14301	10.6441	-6.71549	1.50913	-4.44991	8.59049e-06	0.000480393
HDH_T14983	607.275	1.40193	0.317363	4.41742	9.98868e-06	0.000544695
HDH_T27836	43.887	-4.10728	0.931862	-4.4076	1.04522e-05	0.000564093
HDH_T05516	62.0409	2.52446	0.574487	4.39429	1.11134e-05	0.000587662
HDH_T22500	1260.44	1.42454	0.324144	4.39478	1.10885e-05	0.000587662
HDH_T26565	146.216	-2.19808	0.501992	-4.37872	1.19381e-05	0.000624959
HDH_T21794	861.496	1.74088	0.398105	4.37291	1.22602e-05	0.000629236
HDH_T10224	11.7214	-6.85417	1.56669	-4.37494	1.21464e-05	0.000629236
HDH_T26973	9.57442	-6.56349	1.50378	-4.36465	1.27327e-05	0.000647144
HDH_T15512	10.4813	-6.69466	1.53619	-4.35797	1.31272e-05	0.000660777
HDH_T12675	21.3393	-4.93352	1.13312	-4.35394	1.3371e-05	0.000666641
HDH_T10116	79.604	-2.01697	0.464669	-4.34066	1.42053e-05	0.000701556
HDH_T23043	10.5398	-6.70054	1.54896	-4.32584	1.51949e-05	0.000743415
HDH_T14122	37.3773	4.31009	0.997519	4.32081	1.55459e-05	0.000746632
HDH_T23069	26.5728	-4.7432	1.09757	-4.32155	1.54937e-05	0.000746632
HDH_T10715	23.0954	-5.05844	1.17434	-4.30747	1.6513e-05	0.000785869
HDH_T30818	8.84198	-6.45134	1.50179	-4.29576	1.74099e-05	0.000821088
HDH_T04860	96.7035	1.75734	0.410136	4.28476	1.82935e-05	0.000855058
HDH_T30926	29.1456	-3.42157	0.799277	-4.28083	1.86195e-05	0.000862593
HDH_T22095	357.196	1.02034	0.239012	4.269	1.96349e-05	0.000901656
HDH_T04195	107.999	-2.2261	0.522247	-4.26255	2.0211e-05	0.000920038
HDH_T19500	17.9569	-3.14515	0.740339	-4.24825	2.15442e-05	0.000972276
HDH_T10992	178.3	3.36424	0.792512	4.24503	2.1856e-05	0.000977918
HDH_T20369	156.348	2.2333	0.531045	4.20547	2.60536e-05	0.00111356
HDH_T12387	21.3174	2.78976	0.663269	4.20608	2.59843e-05	0.00111356
HDH_T29175	15.9318	-5.48152	1.30188	-4.21047	2.54844e-05	0.00111356
HDH_T24546	12.2849	-6.92166	1.6438	-4.21078	2.5449e-05	0.00111356
HDH_T24633	8.62587	-6.41337	1.52535	-4.20452	2.6164e-05	0.00111356
HDH_T03450	97.4515	2.63378	0.625669	4.20953	2.55901e-05	0.00111356
HDH_T01326	515.146	1.32769	0.316525	4.19458	2.73381e-05	0.00115415
HDH_T23858	399.358	1.71295	0.409269	4.18538	2.84685e-05	0.00119226
HDH_T14081	25.1801	-3.93532	0.942209	-4.1767	2.95767e-05	0.00122884
HDH_T18159	9.18342	-6.50216	1.55942	-4.16961	3.05128e-05	0.00124012
HDH_T17399	46.1784	-3.26096	0.781643	-4.17193	3.02035e-05	0.00124012
HDH_T01601	9.46958	-6.54574	1.57012	-4.16894	3.06024e-05	0.00124012
HDH_T30517	747.571	1.51242	0.362908	4.1675	3.07958e-05	0.00124012
HDH_T30688	112.505	-1.90307	0.458864	-4.14735	3.36338e-05	0.00133019
HDH_T26476	45.4307	-2.29339	0.552714	-4.14933	3.33448e-05	0.00133019
HDH_T16610	35.8042	-2.95873	0.713589	-4.14626	3.37947e-05	0.00133019
HDH_T24773	93.0018	2.88857	0.697764	4.13975	3.47687e-05	0.00135832
HDH_T28037	152.025	1.56679	0.379964	4.12351	3.73141e-05	0.00144696
HDH_T06494	8.45861	-6.38411	1.55565	-4.10383	4.06363e-05	0.0015642
HDH_T24665	78.9424	1.72989	0.423165	4.08798	4.3515e-05	0.00166278
HDH_T25242	39.6266	-2.69022	0.66059	-4.07245	4.65218e-05	0.00176479
HDH_T19417	48.0437	1.88803	0.464229	4.06703	4.76159e-05	0.0017805
HDH_T08698	11.338	-6.8058	1.67283	-4.06843	4.73319e-05	0.0017805
HDH_T30695	18.1184	2.71005	0.666987	4.06312	4.84202e-05	0.00179773
HDH_T26204	46.7251	3.07623	0.757719	4.05986	4.91023e-05	0.00181022
HDH_T03135	13.1626	-7.02629	1.73193	-4.05691	4.97256e-05	0.00182037
HDH_T17359	8.58629	-6.40498	1.58322	-4.04554	5.22021e-05	0.00189776
HDH_T19238	28.0333	-2.64756	0.655203	-4.04082	5.32651e-05	0.00192306
HDH_T12641	52.3704	-1.69994	0.421238	-4.03559	5.44652e-05	0.00195291
HDH_T16779	143.873	1.54666	0.384809	4.01928	5.83768e-05	0.00207691
HDH_T03373	37.1813	-3.46368	0.86206	-4.01791	5.87167e-05	0.00207691
HDH_T24552	230.052	1.822	0.455458	4.00037	6.32437e-05	0.00222202
HDH_T03407	50.7335	-2.91168	0.728389	-3.99742	6.40362e-05	0.00223486
HDH_T23186	125.862	1.79719	0.45003	3.99348	6.51094e-05	0.00225727
HDH_T30655	113.735	-1.86189	0.466702	-3.98946	6.62245e-05	0.00227686
HDH_T30481	50.7306	-2.43628	0.610854	-3.98831	6.65443e-05	0.00227686
HDH_T08704	7.45091	-6.20367	1.55987	-3.97704	6.97781e-05	0.00234861
HDH_T22392	22.0568	-3.92727	0.987447	-3.97719	6.97337e-05	0.00234861
HDH_T27451	334.459	1.27646	0.321014	3.97633	6.99872e-05	0.00234861
HDH_T22876	46.5896	2.38841	0.601138	3.97314	7.09309e-05	0.00236512
HDH_T22668	16.9459	-3.43256	0.865428	-3.96632	7.29919e-05	0.00241843
HDH_T25084	449.585	-1.85275	0.468199	-3.95718	7.58413e-05	0.00249704
HDH_T04525	25.572	-3.39743	0.862791	-3.93772	8.22606e-05	0.00268742
HDH_T13225	9.6515	-6.5728	1.6703	-3.93509	8.31638e-05	0.00268742
HDH_T27175	7.36066	6.52257	1.65738	3.93547	8.3033e-05	0.00268742
HDH_T04742	17.5654	-3.25485	0.827679	-3.9325	8.40667e-05	0.00269994
HDH_T13029	13.7928	-5.27492	1.34564	-3.92002	8.85424e-05	0.00282634
HDH_T23177	657.639	1.4096	0.359988	3.91568	9.01499e-05	0.00286021
HDH_T22770	2513.56	-1.61788	0.413757	-3.91021	9.2215e-05	0.00290811
HDH_T27160	18.7751	-3.67508	0.940788	-3.90638	9.36878e-05	0.00293686
HDH_T10987	32.9736	2.41574	0.621219	3.88871	0.00010078	0.00306733
HDH_T02006	7.04699	6.45451	1.65782	3.89337	9.88618e-05	0.00306733
HDH_T08411	41.7636	-2.32271	0.597133	-3.88977	0.00010034	0.00306733
HDH_T02097	8.65201	-6.41529	1.64862	-3.89131	9.97037e-05	0.00306733
HDH_T07586	8.48205	-6.38653	1.64141	-3.89089	9.98765e-05	0.00306733
HDH_T30601	152.641	-1.67346	0.430565	-3.88667	0.00010163	0.00307533
HDH_T10641	23.636	-3.57074	0.921504	-3.8749	0.000106668	0.00320922
HDH_T08737	20.8851	-3.25656	0.841009	-3.87221	0.000107854	0.00322636
HDH_T06742	18.857	-3.21227	0.83044	-3.86815	0.000109663	0.00326186
HDH_T26975	18.8315	-3.93278	1.01738	-3.8656	0.000110818	0.00327173
HDH_T23708	108.321	-1.81845	0.470534	-3.86466	0.000111245	0.00327173
HDH_T08217	7.9656	-6.29579	1.63298	-3.8554	0.000115543	0.00336519
HDH_T11682	50.8803	-2.18317	0.566326	-3.85498	0.000115741	0.00336519
HDH_T01782	7.29619	-6.17021	1.60168	-3.85234	0.000116994	0.00336519
HDH_T28097	19.5937	-3.50881	0.910552	-3.8535	0.000116442	0.00336519
HDH_T31397	31.8392	-2.37295	0.616228	-3.85076	0.000117753	0.0033685
HDH_T11026	169.648	1.40675	0.36569	3.84685	0.000119647	0.0034041
HDH_T12856	14.872	-3.96617	1.03276	-3.84038	0.000122846	0.00347621
HDH_T23919	604.993	1.41327	0.368441	3.83582	0.000125147	0.00352227
HDH_T25981	1455.23	1.45998	0.381115	3.83082	0.000127715	0.00357533
HDH_T16085	23.5562	-2.79705	0.732413	-3.81895	0.000134021	0.00373191
HDH_T09071	33.786	-2.30593	0.604931	-3.81189	0.000137911	0.0037998
HDH_T17459	16.1061	-4.79992	1.25896	-3.8126	0.000137514	0.0037998
HDH_T30849	8.18381	-6.33498	1.6654	-3.80389	0.000142441	0.0038437
HDH_T26908	20.9511	2.84587	0.747918	3.80505	0.000141776	0.0038437
HDH_T17591	7.18433	-6.14758	1.61571	-3.80489	0.00014187	0.0038437
HDH_T09542	6.67398	-6.0454	1.58831	-3.80618	0.000141132	0.0038437
HDH_T10258	27.97	-3.46662	0.911932	-3.8014	0.000143881	0.00386265
HDH_T02517	8.24519	-6.34541	1.66985	-3.79998	0.000144708	0.00386502
HDH_T25978	74.3715	-2.26619	0.596732	-3.79767	0.000146064	0.00388144
HDH_T05558	48.9436	2.03611	0.536693	3.79381	0.000148355	0.00392241
HDH_T03047	215.834	1.8352	0.484918	3.78456	0.00015398	0.00400978
HDH_T18549	20.4178	-2.31332	0.610955	-3.7864	0.000152848	0.00400978
HDH_T22101	8.37675	-6.36866	1.68326	-3.78353	0.000154621	0.00400978
HDH_T27962	24.9247	-2.24103	0.592338	-3.78336	0.000154723	0.00400978
HDH_T08601	79.0771	-2.60978	0.691016	-3.77672	0.000158904	0.00409686
HDH_T01619	13.8414	-4.09921	1.08572	-3.77556	0.000159648	0.00409686
HDH_T08200	45.9679	-2.37192	0.628854	-3.7718	0.000162071	0.00413875
HDH_T12529	22.6607	-2.42623	0.643822	-3.76848	0.000164242	0.00417382
HDH_T06394	79.3705	-1.93814	0.514682	-3.7657	0.00016608	0.00420015
HDH_T15744	6.6816	-6.04497	1.60726	-3.76105	0.000169202	0.00425852
HDH_T09656	214.226	1.96108	0.524592	3.7383	0.000185267	0.00464053
HDH_T11825	51.3328	2.1573	0.577805	3.73361	0.000188756	0.00470543
HDH_T03956	7.87179	-6.27881	1.68243	-3.73199	0.000189975	0.00471335
HDH_T04389	6.39544	-5.98372	1.60426	-3.72989	0.000191561	0.0047303
HDH_T01847	1207.78	2.15303	0.578242	3.72341	0.000196552	0.00483074
HDH_T28929	184.351	-1.969	0.5293	-3.72001	0.000199215	0.0048335
HDH_T17244	314.077	-2.0885	0.561264	-3.72107	0.000198382	0.0048335
HDH_T02306	59.1191	-1.99872	0.537328	-3.71973	0.000199434	0.0048335
HDH_T28832	16.7001	-3.88477	1.0451	-3.71714	0.000201491	0.00486087
HDH_T17633	6.55285	-6.02081	1.62037	-3.71571	0.000202637	0.00486607
HDH_T29832	351.063	9.25372	2.49495	3.70898	0.000208098	0.00497439
HDH_T26467	19.0081	-4.6089	1.24463	-3.70302	0.000213048	0.00506956
HDH_T26246	36.9229	-1.86397	0.504913	-3.69167	0.000222782	0.00525345
HDH_T15047	287.394	-1.39288	0.37767	-3.68808	0.000225951	0.00528061
HDH_T14658	12.4126	-5.02298	1.36158	-3.68908	0.000225064	0.00528061
HDH_T24524	430.476	2.25748	0.61237	3.68646	0.000227396	0.00529074
HDH_T16807	146.152	1.92696	0.523162	3.6833	0.000230238	0.00529524
HDH_T17007	127.895	1.64899	0.447741	3.6829	0.000230595	0.00529524
HDH_T14439	33.7412	-2.75241	0.747356	-3.68287	0.000230624	0.00529524
HDH_T26560	154.286	1.04048	0.282794	3.67929	0.000233887	0.00534671
HDH_T22299	33.3037	-3.33277	0.906519	-3.67645	0.000236503	0.00535971
HDH_T26759	7.6503	-6.23819	1.69894	-3.67181	0.000240836	0.00543438
HDH_T22657	8.42277	-6.3761	1.73736	-3.66999	0.000242565	0.0054499
HDH_T23089	6.26565	6.27975	1.71458	3.66256	0.000249709	0.00558644
HDH_T13600	15.6691	-3.9941	1.09153	-3.65918	0.000253023	0.00561261
HDH_T29994	1688.62	1.67813	0.458501	3.66004	0.000252173	0.00561261
HDH_T01882	6.56914	-6.01846	1.6483	-3.65131	0.000260904	0.00576301
HDH_T23079	15.3446	-4.1269	1.13309	-3.64217	0.000270352	0.00594661
HDH_T27481	469.144	1.9158	0.526936	3.63573	0.000277193	0.00607156
HDH_T08490	144.563	-1.11512	0.307994	-3.62059	0.000293927	0.00641128
HDH_T13324	7.42657	-6.19465	1.7124	-3.61752	0.00029744	0.00646099
HDH_T18732	244.874	1.78053	0.493156	3.61048	0.00030563	0.00658061
HDH_T16038	20.0029	-3.60949	0.999981	-3.60956	0.000306718	0.00658061
HDH_T12713	75.3714	-1.581	0.437853	-3.6108	0.000305253	0.00658061
HDH_T01846	2199.37	-1.55149	0.43049	-3.60401	0.000313343	0.00669531
HDH_T26274	66.7171	3.1103	0.863596	3.60157	0.000316298	0.00673098
HDH_T28506	14.9387	-3.97347	1.10503	-3.5958	0.000323398	0.00683498
HDH_T28322	741.84	1.34938	0.3753	3.59548	0.000323797	0.00683498
HDH_T12153	11.6607	-3.94489	1.09764	-3.59397	0.000325676	0.00684704
HDH_T00994	11.3756	-4.84698	1.3499	-3.59062	0.000329896	0.00690386
HDH_T12542	10.1452	-5.66065	1.5769	-3.58973	0.000331016	0.00690386
HDH_T07803	12.0179	-5.08163	1.41606	-3.58858	0.000332482	0.00690692
HDH_T29708	48.6909	1.65778	0.462312	3.58586	0.000335973	0.00695186
HDH_T20904	10.2662	-4.83974	1.3528	-3.57758	0.000346788	0.00714738
HDH_T21667	6.32328	-5.97618	1.67205	-3.57417	0.000351347	0.00721295
HDH_T08436	13.5253	-4.26386	1.19461	-3.56926	0.000357994	0.0073207
HDH_T10523	20.9514	-4.35109	1.21941	-3.56818	0.000359465	0.00732219
HDH_T21625	45.2427	2.10225	0.590778	3.55844	0.000373066	0.00756977
HDH_T02584	6.12674	-5.92162	1.66617	-3.55404	0.000379362	0.00766781
HDH_T24717	474.666	1.35747	0.38228	3.55098	0.000383805	0.00766878
HDH_T05513	5.95947	-5.87968	1.6555	-3.55161	0.000382876	0.00766878
HDH_T22768	5.95127	-5.87786	1.6549	-3.5518	0.000382605	0.00766878
HDH_T13952	28.52	3.47697	0.980758	3.54518	0.000392341	0.00780952
HDH_T24337	50.8513	-3.52802	0.995867	-3.54266	0.000396112	0.00785473
HDH_T28343	13.6253	-4.47682	1.26462	-3.54005	0.000400054	0.00790296
HDH_T09817	661.365	1.53548	0.434947	3.53028	0.000415125	0.00816985
HDH_T10833	9.8951	-5.62418	1.59443	-3.5274	0.000419661	0.00822819
HDH_T29167	108.711	-1.35521	0.384366	-3.52584	0.000422147	0.00824605
HDH_T14298	20.8282	4.3774	1.24607	3.51295	0.000443164	0.00861344
HDH_T20064	144.61	-1.77419	0.505136	-3.5123	0.000444246	0.00861344
HDH_T17781	209.929	2.68474	0.764737	3.51068	0.000446966	0.00863419
HDH_T15422	52.6779	-1.83742	0.523586	-3.50929	0.000449297	0.00864732
HDH_T15067	5.72649	-5.82346	1.66098	-3.50604	0.000454835	0.00867918
HDH_T13948	30.3123	-3.22533	0.920046	-3.50561	0.000455559	0.00867918
HDH_T03978	86.6395	1.4914	0.425459	3.5054	0.000455926	0.00867918
HDH_T00509	660.143	1.57924	0.450934	3.50216	0.000461498	0.00875341
HDH_T14241	57.5883	-1.60378	0.458768	-3.49583	0.000472584	0.00889919
HDH_T22035	96.5588	2.17824	0.623028	3.49621	0.000471909	0.00889919
HDH_T12190	181.191	1.74744	0.501105	3.48718	0.00048815	0.00899811
HDH_T29804	216.998	2.01378	0.577117	3.48937	0.000484153	0.00899811
HDH_T15526	6.24176	-5.94352	1.7031	-3.48983	0.000483327	0.00899811
HDH_T06838	7.03617	-6.11627	1.75387	-3.48729	0.000487944	0.00899811
HDH_T23176	7.82072	-6.2691	1.79679	-3.48905	0.000484744	0.00899811
HDH_T05979	6.56691	-6.01733	1.72463	-3.48905	0.00048474	0.00899811
HDH_T21126	108.974	1.93194	0.554459	3.48437	0.000493289	0.00906093
HDH_T19114	6.46982	-5.99501	1.72207	-3.48129	0.000499001	0.00913381
HDH_T02838	61.4202	-2.02365	0.582129	-3.47629	0.000508409	0.0092736
HDH_T24748	28.1709	-1.93801	0.557817	-3.47427	0.000512248	0.00928703
HDH_T05910	17.5327	2.35271	0.677226	3.47404	0.000512694	0.00928703
HDH_T11835	14.9345	-4.16246	1.19927	-3.47084	0.000518838	0.00934296
HDH_T31419	270.916	1.57618	0.454156	3.47057	0.000519351	0.00934296
HDH_T18623	9.59583	-5.5697	1.60607	-3.4679	0.00052454	0.00940399
HDH_T02609	97.2497	1.94438	0.560949	3.46623	0.000527815	0.00943042
HDH_T27813	52.2626	-1.6208	0.46789	-3.46405	0.000532104	0.00944573
HDH_T09421	33.5673	-2.47475	0.714429	-3.46396	0.000532281	0.00944573
HDH_T05817	383.591	2.09282	0.605308	3.45745	0.000545321	0.00964445
HDH_T08310	14.5385	-2.69537	0.780244	-3.45453	0.000551261	0.00971668
HDH_T06608	499.038	-1.0552	0.306077	-3.44751	0.000565788	0.00993927
HDH_T13723	157.41	-1.42815	0.414652	-3.44422	0.000572712	0.00996326
HDH_T16008	55.0429	1.28346	0.37265	3.44415	0.000572864	0.00996326
HDH_T02568	41.2198	1.77396	0.516049	3.43758	0.000586939	0.0101743
HDH_T10907	38.3354	2.0907	0.609067	3.43263	0.000597755	0.0103275
HDH_T11833	20.0449	-2.44878	0.713958	-3.42987	0.000603876	0.0103649
HDH_T23505	34.0187	-1.86497	0.543636	-3.43055	0.000602361	0.0103649
HDH_T11571	5.39313	-5.73755	1.67401	-3.42743	0.000609327	0.0104243
HDH_T29723	871.619	1.15316	0.33673	3.42459	0.000615736	0.0104655
HDH_T07544	223.585	1.92884	0.563195	3.42482	0.00061521	0.0104655
HDH_T15419	5.9084	-5.8644	1.71499	-3.4195	0.000627366	0.0106287
HDH_T18588	9.31701	-5.53037	1.61921	-3.41547	0.00063671	0.0107204
HDH_T27541	19.0193	-2.22705	0.652061	-3.4154	0.000636873	0.0107204
HDH_T05559	12.3098	-4.54407	1.33208	-3.41126	0.000646632	0.0107986
HDH_T02436	64.9835	1.47603	0.432632	3.41175	0.000645462	0.0107986
HDH_T12001	219.699	1.47146	0.431411	3.41081	0.000647709	0.0107986
HDH_T22203	16.3713	-4.24046	1.2444	-3.40764	0.000655277	0.0108624
HDH_T30820	7.2681	-6.16454	1.80913	-3.40747	0.000655687	0.0108624
HDH_T09171	107.227	1.6417	0.482326	3.40372	0.000664755	0.0109779
HDH_T21032	57.4081	-1.3974	0.411025	-3.39979	0.000674376	0.0111017
HDH_T13635	21.8642	-2.28983	0.675362	-3.39052	0.000697592	0.0114479
HDH_T10462	9.88049	-4.06501	1.19928	-3.38955	0.000700075	0.0114526
HDH_T30334	1833.21	1.48353	0.437787	3.3887	0.000702248	0.0114526
HDH_T05581	13.0335	-3.82183	1.13237	-3.37507	0.000737963	0.0119605
HDH_T29957	5.91392	-5.8679	1.74028	-3.37181	0.000746764	0.0119918
HDH_T19884	40.3145	1.90716	0.565359	3.37336	0.000742568	0.0119918
HDH_T12423	7.54218	-6.21683	1.84352	-3.37226	0.000745554	0.0119918
HDH_T02757	5.22481	-5.69224	1.68978	-3.36864	0.000755405	0.0120934
HDH_T12463	13.5483	5.1299	1.52452	3.36492	0.00076566	0.0122202
HDH_T26028	97.4796	1.27138	0.378048	3.36302	0.000770935	0.012267
HDH_T20020	273.728	1.68571	0.501601	3.36065	0.000777591	0.0123354
HDH_T26260	6.12733	-5.92377	1.76363	-3.35885	0.000782671	0.0123785
HDH_T23844	111.041	3.50418	1.0439	3.35681	0.000788472	0.0124327
HDH_T08506	6.1962	-5.9326	1.76916	-3.35334	0.000798434	0.0124647
HDH_T27996	39.0423	-2.59392	0.773647	-3.35285	0.000799838	0.0124647
HDH_T24005	48.6993	-4.3066	1.28448	-3.35279	0.000800027	0.0124647
HDH_T09415	6.3103	-5.96112	1.77679	-3.35499	0.000793668	0.0124647
HDH_T25062	222.066	1.85204	0.552877	3.34983	0.000808609	0.012561
HDH_T25219	31.3239	-2.88787	0.862588	-3.34791	0.000814228	0.0126109
HDH_T15932	6.0246	-5.89191	1.76048	-3.34676	0.000817608	0.0126259
HDH_T04210	6.35973	-5.97502	1.78578	-3.34588	0.000820212	0.0126289
HDH_T28499	190.573	1.92983	0.577028	3.34443	0.00082451	0.0126578
HDH_T29627	74.4322	3.84833	1.15136	3.34243	0.000830487	0.0126899
HDH_T02207	5.29112	-5.7093	1.70829	-3.34211	0.000831451	0.0126899
HDH_T02235	14.7319	-3.41031	1.02144	-3.33872	0.000841655	0.0128083
HDH_T16306	8.76121	-4.60957	1.38118	-3.33741	0.000845636	0.0128316
HDH_T23224	5.63373	-5.79732	1.73829	-3.33508	0.000852751	0.0128519
HDH_T08657	5.29217	-5.70709	1.7115	-3.33456	0.000854341	0.0128519
HDH_T10232	5.52023	-5.7672	1.72926	-3.33506	0.000852795	0.0128519
HDH_T30988	5.57294	-5.7846	1.73551	-3.33308	0.000858899	0.0128835
HDH_T14911	18.4598	-2.16159	0.648777	-3.33179	0.000862901	0.0129065
HDH_T25105	5.8037	-5.8403	1.75603	-3.32585	0.000881484	0.0131469
HDH_T02132	5.29381	-5.70758	1.7186	-3.32106	0.000896749	0.0133366
HDH_T03730	5.853	-5.85021	1.76233	-3.31959	0.000901496	0.0133692
HDH_T05716	5.3437	-5.72048	1.72468	-3.31685	0.000910397	0.0134631
HDH_T11831	18.7099	-2.30661	0.695622	-3.3159	0.000913488	0.0134707
HDH_T04616	26.2634	1.73819	0.524538	3.31376	0.000920501	0.013536
HDH_T22005	93.1557	1.00841	0.304445	3.3123	0.000925332	0.0135689
HDH_T02245	81.2632	1.09018	0.32924	3.31122	0.000928914	0.0135834
HDH_T05465	490.066	1.78252	0.53852	3.31003	0.000932875	0.0136034
HDH_T25567	12.5686	-4.42212	1.3375	-3.30625	0.000945531	0.0137496
HDH_T01889	5.40673	-5.73662	1.73654	-3.30348	0.000954939	0.0138097
HDH_T03289	43.0711	-2.18108	0.660204	-3.30364	0.000954374	0.0138097
HDH_T08494	48.3946	2.03209	0.61562	3.30089	0.000963777	0.0138991
HDH_T07536	5.00062	-5.63327	1.70834	-3.2975	0.000975494	0.0140294
HDH_T04316	47.1418	-1.7824	0.543793	-3.27772	0.00104651	0.015004
HDH_T02046	68.1151	1.49708	0.456839	3.27705	0.00104899	0.015004
HDH_T05660	37.2642	1.72663	0.527604	3.27258	0.0010657	0.0151601
HDH_T27909	170.904	1.43113	0.438574	3.26314	0.00110186	0.015506
HDH_T08058	22.0706	-1.94423	0.595687	-3.26384	0.00109913	0.015506
HDH_T30996	4.45504	5.78889	1.7737	3.26373	0.00109956	0.015506
HDH_T08353	145.128	-1.81355	0.555503	-3.26471	0.00109576	0.015506
HDH_T04058	5.86344	-5.85481	1.79577	-3.26033	0.00111282	0.0156182
HDH_T11815	6.70058	-6.04564	1.85495	-3.25919	0.00111732	0.0156395
HDH_T15051	254.179	1.04885	0.322027	3.25702	0.00112588	0.0157173
HDH_T29486	31.7979	3.93701	1.2091	3.25614	0.00112936	0.015724
HDH_T04437	5.04782	-5.64839	1.73571	-3.25423	0.00113699	0.0157881
HDH_T25065	45.6125	-1.89169	0.582568	-3.24716	0.00116561	0.0160471
HDH_T07432	25.4181	-3.13566	0.965284	-3.24843	0.00116043	0.0160471
HDH_T00677	87.359	-2.40486	0.74068	-3.24682	0.00116701	0.0160471
HDH_T16009	26.412	-2.46777	0.760107	-3.24661	0.0011679	0.0160471
HDH_T20561	22.8206	-4.26293	1.31377	-3.24482	0.00117527	0.0161061
HDH_T11429	1157.74	-2.10998	0.650596	-3.24315	0.00118214	0.016151
HDH_T16014	397.284	1.25175	0.38604	3.24253	0.00118472	0.016151
HDH_T05357	30.1578	-2.42978	0.749671	-3.24113	0.00119058	0.0161888
HDH_T26400	1396.07	1.34618	0.415885	3.23691	0.00120831	0.0163874
HDH_T10189	17.3312	2.94498	0.911171	3.23209	0.0012289	0.0166235
HDH_T09759	21.6231	-3.37027	1.0433	-3.2304	0.00123618	0.0166748
HDH_T04241	2015.16	1.40844	0.436085	3.22973	0.00123906	0.0166748
HDH_T24092	5.4687	-5.75489	1.78347	-3.22679	0.00125185	0.016718
HDH_T00744	33.7046	-3.09168	0.958124	-3.22681	0.00125178	0.016718
HDH_T19483	9.97867	6.95524	2.15479	3.22781	0.00124742	0.016718
HDH_T23849	45.6532	1.63833	0.508045	3.22478	0.00126068	0.0167931
HDH_T11300	10.4706	-4.70182	1.4589	-3.22286	0.00126918	0.0168634
HDH_T06174	36.1293	-2.47984	0.769779	-3.22149	0.00127525	0.0169011
HDH_T06414	28.0713	-3.46276	1.07542	-3.21992	0.00128225	0.016951
HDH_T19651	11.4951	-4.28655	1.33291	-3.21594	0.00130019	0.0170589
HDH_T10629	140.125	1.56012	0.485084	3.21618	0.0012991	0.0170589
HDH_T14588	8.82269	-4.45836	1.38582	-3.21712	0.00129483	0.0170589
HDH_T17505	61.3431	1.32955	0.414449	3.20799	0.00133664	0.0172482
HDH_T06101	22.2719	2.35654	0.734903	3.2066	0.00134312	0.0172482
HDH_T07559	5.75321	-5.82703	1.81522	-3.2101	0.00132691	0.0172482
HDH_T08741	5.34968	-5.7205	1.78189	-3.21036	0.00132567	0.0172482
HDH_T16933	158.735	1.31197	0.408631	3.21063	0.00132442	0.0172482
HDH_T20431	14.9481	-3.08283	0.960581	-3.20934	0.00133042	0.0172482
HDH_T01731	9.62635	-4.58051	1.4292	-3.20495	0.00135084	0.0172482
HDH_T08691	101.417	-1.44464	0.450554	-3.20637	0.00134419	0.0172482
HDH_T27249	65.5043	-2.16155	0.673823	-3.20788	0.00133717	0.0172482
HDH_T19135	19.4128	-2.16565	0.675721	-3.20495	0.00135086	0.0172482
HDH_T09921	5.97412	-5.87962	1.83445	-3.20512	0.00135006	0.0172482
HDH_T02526	20.8321	-2.09656	0.654439	-3.20359	0.00135726	0.0172778
HDH_T05282	298.702	1.83844	0.574084	3.20239	0.0013629	0.0172778
HDH_T21681	17.0721	-3.51223	1.09676	-3.20236	0.00136308	0.0172778
HDH_T29508	54.0295	1.58188	0.494231	3.20069	0.001371	0.0173362
HDH_T25699	25.4115	-2.21603	0.693349	-3.19612	0.00139288	0.0175704
HDH_T26830	42.1276	-1.44512	0.452647	-3.1926	0.00141001	0.0177437
HDH_T03631	4.7297	-5.54978	1.74086	-3.18795	0.00143287	0.0179882
HDH_T12971	6.54046	-6.01092	1.887	-3.18544	0.00144535	0.0181015
HDH_T02250	5.58489	-5.7842	1.81683	-3.18367	0.00145422	0.0181691
HDH_T17771	19.9103	1.88408	0.592304	3.18093	0.00146803	0.0182544
HDH_T15210	52.6621	-1.59113	0.50011	-3.18155	0.00146488	0.0182544
HDH_T23709	12.0126	4.61276	1.45137	3.17822	0.00148181	0.0183821
HDH_T15121	6.11269	-5.92462	1.86478	-3.17711	0.00148749	0.0184089
HDH_T27575	4.66398	-5.53398	1.74276	-3.17541	0.00149623	0.0184736
HDH_T23951	5.92423	-5.8681	1.84923	-3.17327	0.00150734	0.0185233
HDH_T27143	4.84859	-5.58067	1.75863	-3.1733	0.00150715	0.0185233
HDH_T23613	73.6232	1.85763	0.586089	3.16953	0.00152683	0.0186141
HDH_T05252	18.0744	-3.19837	1.00907	-3.16962	0.0015264	0.0186141
HDH_T20885	9.39934	-4.54317	1.43317	-3.17002	0.00152428	0.0186141
HDH_T04146	25.7626	-2.97469	0.938646	-3.16913	0.00152895	0.0186141
HDH_T04429	4.66234	-5.53349	1.74693	-3.16755	0.00153731	0.018645
HDH_T19936	44.7455	-2.41586	0.76275	-3.1673	0.00153861	0.018645
HDH_T25999	130.15	1.11835	0.353252	3.16589	0.0015461	0.0186925
HDH_T17406	4.57219	5.82918	1.8424	3.16391	0.00155665	0.0187767
HDH_T08020	199.038	1.68216	0.531811	3.16308	0.00156108	0.0187868
HDH_T26438	313.075	-2.23462	0.706812	-3.16155	0.00156932	0.0188427
HDH_T23319	11.7083	-2.88192	0.911891	-3.16038	0.00157563	0.0188751
HDH_T28622	943.912	1.30218	0.412331	3.1581	0.00158803	0.0189803
HDH_T17706	26.9788	3.35922	1.06535	3.15317	0.00161509	0.0191479
HDH_T16385	6.93356	-6.09561	1.93383	-3.15209	0.00162106	0.0191479
HDH_T22333	9.90467	-4.80936	1.52498	-3.15371	0.00161208	0.0191479
HDH_T11027	249.274	1.74219	0.55247	3.15346	0.0016135	0.0191479
HDH_T09437	12.3753	-2.90978	0.923626	-3.15039	0.00163051	0.0191479
HDH_T22559	33.2413	-2.78299	0.883418	-3.15025	0.00163132	0.0191479
HDH_T03500	36.6695	-2.64663	0.839969	-3.15087	0.00162787	0.0191479
HDH_T06580	34.5334	-1.6933	0.538208	-3.14618	0.00165419	0.0193729
HDH_T06026	3180.67	1.59649	0.507984	3.14279	0.00167345	0.0195111
HDH_T15072	1702.18	1.18516	0.377102	3.14281	0.00167336	0.0195111
HDH_T15471	4.5	-5.47991	1.7462	-3.13819	0.00169994	0.0196884
HDH_T09001	11.8435	-4.07521	1.29849	-3.13842	0.00169861	0.0196884
HDH_T22638	18.1944	-2.0955	0.667678	-3.13848	0.00169825	0.0196884
HDH_T23614	14.337	-3.77101	1.20199	-3.13732	0.001705	0.0197034
HDH_T02619	9.56474	-4.75609	1.51794	-3.13326	0.00172875	0.0199339
HDH_T05474	8.49531	-4.39681	1.40382	-3.13203	0.00173604	0.0199741
HDH_T01118	5.22527	-5.68863	1.82006	-3.12552	0.0017749	0.0203663
HDH_T16831	6.03386	-5.89417	1.88612	-3.12502	0.00177792	0.0203663
HDH_T11845	4.62381	-5.51343	1.7648	-3.12412	0.0017834	0.0203845
HDH_T25693	13.6064	-3.17794	1.01781	-3.12232	0.00179431	0.0204646
HDH_T01378	145.754	1.51614	0.485907	3.12023	0.00180711	0.0205211
HDH_T01112	11.0542	-2.70039	0.865423	-3.12031	0.00180662	0.0205211
HDH_T20371	4.94311	-5.61942	1.80429	-3.11447	0.00184275	0.0208574
HDH_T17688	28.5352	-1.72256	0.553137	-3.11416	0.0018447	0.0208574
HDH_T09189	11.1716	-6.7893	2.18184	-3.11173	0.00185995	0.0209846
HDH_T21466	5.4708	-5.75241	1.85104	-3.10766	0.00188573	0.0211841
HDH_T17901	20.5942	-2.16288	0.695893	-3.10807	0.00188313	0.0211841
HDH_T26333	5.19285	-5.67794	1.82904	-3.10432	0.00190716	0.021379
HDH_T27488	32.3197	-1.68442	0.543717	-3.09798	0.00194847	0.0216083
HDH_T07270	12.3093	4.19588	1.35464	3.09742	0.00195211	0.0216083
HDH_T02860	18.7506	-2.93047	0.946111	-3.09738	0.00195238	0.0216083
HDH_T23407	20.3536	-2.69302	0.869252	-3.09809	0.00194774	0.0216083
HDH_T27401	37.8503	-1.72752	0.557552	-3.0984	0.00194567	0.0216083
HDH_T19349	4.67488	-5.53402	1.78515	-3.10004	0.00193496	0.0216083
HDH_T15053	16.0705	-2.12572	0.686593	-3.09604	0.00196127	0.0216609
HDH_T14976	5.02289	-5.62975	1.81895	-3.09506	0.00196771	0.0216862
HDH_T30885	42.8918	-1.87034	0.604853	-3.09221	0.00198669	0.0218036
HDH_T03287	292.726	-1.40524	0.454408	-3.09247	0.001985	0.0218036
HDH_T23181	14.2395	-3.37054	1.09116	-3.08895	0.00200862	0.0219522
HDH_T00751	5.69065	-5.80937	1.88053	-3.08922	0.0020068	0.0219522
HDH_T14079	4.51195	-5.47732	1.77392	-3.08769	0.00201719	0.022
HDH_T13362	173.418	-1.42165	0.460549	-3.08686	0.00202282	0.0220155
HDH_T02574	108.329	1.18701	0.385044	3.08279	0.00205072	0.0222728
HDH_T06495	4.39739	-5.44249	1.76656	-3.08084	0.00206419	0.0223727
HDH_T22106	9.44865	4.16038	1.35192	3.0774	0.00208815	0.0225857
HDH_T02090	4.57005	-5.49485	1.78753	-3.074	0.00211212	0.0227978
HDH_T27253	27.3492	-2.92198	0.950844	-3.07304	0.00211892	0.0228241
HDH_T18049	13.602	-2.68193	0.873122	-3.07166	0.00212875	0.0228829
HDH_T21003	4.569	-5.49741	1.79107	-3.06934	0.00214531	0.022978
HDH_T02509	25.2501	-2.24879	0.732697	-3.06919	0.00214637	0.022978
HDH_T22532	12.5346	-4.32801	1.41264	-3.06377	0.00218567	0.023351
HDH_T10357	15.3116	-4.28473	1.40016	-3.06018	0.00221203	0.0235845
HDH_T01037	10.168	-3.83756	1.25434	-3.05941	0.00221772	0.0235971
HDH_T14348	8.7486	-5.44363	1.78078	-3.05688	0.0022365	0.0237487
HDH_T19973	8.46189	6.71762	2.19823	3.05591	0.00224375	0.0237774
HDH_T28288	5.06621	-5.64207	1.84776	-3.05347	0.0022621	0.0239234
HDH_T05392	5.59396	6.11939	2.00523	3.05171	0.0022754	0.0239608
HDH_T26325	61.2588	-3.04972	0.999519	-3.05119	0.00227937	0.0239608
HDH_T07030	4.79706	-5.56663	1.8244	-3.05122	0.00227916	0.0239608
HDH_T09095	61.6876	1.62245	0.532154	3.04883	0.00229731	0.0241011
HDH_T01662	4.23054	5.71649	1.87641	3.0465	0.00231524	0.0242405
HDH_T25258	8.50716	-4.58001	1.50374	-3.04574	0.00232105	0.0242529
HDH_T13213	5.13416	-5.66062	1.86074	-3.04213	0.00234907	0.024448
HDH_T07980	4.79975	-5.56502	1.82907	-3.04254	0.0023459	0.024448
HDH_T04501	4.28389	-5.40403	1.77698	-3.04113	0.0023569	0.0244809
HDH_T12911	5.51741	-5.76488	1.89648	-3.03978	0.00236751	0.0245424
HDH_T25652	33.1456	1.93933	0.638739	3.03618	0.00239598	0.0246909
HDH_T12800	15.3934	-2.9746	0.979677	-3.03631	0.00239494	0.0246909
HDH_T05532	64.0238	-1.81911	0.600019	-3.03176	0.00243135	0.0249178
HDH_T26113	69.0587	-1.75349	0.578396	-3.03164	0.00243228	0.0249178
HDH_T15225	1892.73	1.38836	0.457842	3.03241	0.0024261	0.0249178
HDH_T21501	10.858	-3.48396	1.15006	-3.02936	0.00245072	0.0249602
HDH_T28341	3.97814	5.62344	1.85566	3.03043	0.00244209	0.0249602
HDH_T24527	4.57333	-5.49609	1.81427	-3.02936	0.00245068	0.0249602
HDH_T28370	61.3517	-1.40913	0.465279	-3.02858	0.0024571	0.0249765
HDH_T06020	6.32553	-5.96372	1.97145	-3.02503	0.00248606	0.0252219
HDH_T18859	8.98279	-4.07043	1.3461	-3.02387	0.00249567	0.0252705
HDH_T19669	48.5545	1.77368	0.586697	3.02316	0.00250153	0.0252809
HDH_T31398	9.30662	-3.6114	1.19496	-3.02219	0.00250955	0.0253126
HDH_T26158	159.746	1.24158	0.410901	3.02161	0.00251434	0.0253126
HDH_T18143	4.17097	-5.36807	1.77962	-3.01642	0.00255778	0.0257006
HDH_T00876	37.5118	-2.496	0.827749	-3.01541	0.00256632	0.0257049
HDH_T29760	88.9933	-1.42066	0.471164	-3.01521	0.00256803	0.0257049
HDH_T06717	4.73778	-5.5449	1.8395	-3.01435	0.00257532	0.0257286
HDH_T01594	16.0514	-2.80492	0.931135	-3.01236	0.00259222	0.0258481
HDH_T19621	4.5445	-5.4984	1.82592	-3.0113	0.00260131	0.0258894
HDH_T19202	4.9642	-5.61198	1.86434	-3.01017	0.00261106	0.0259372
HDH_T20089	21.6477	-1.88543	0.627118	-3.0065	0.00264275	0.0261528
HDH_T05306	2089.4	1.1069	0.368153	3.00662	0.00264169	0.0261528
HDH_T18196	16.0173	-2.2604	0.752606	-3.00343	0.00266954	0.026368
HDH_T30104	22.0789	-1.96284	0.653752	-3.00243	0.00267837	0.0264054
HDH_T16417	611.574	1.05367	0.351089	3.00115	0.00268958	0.0264164
HDH_T26166	28.6582	-1.78857	0.595881	-3.00155	0.00268611	0.0264164
HDH_T12436	5.75263	-4.8167	1.60663	-2.99802	0.00271743	0.026559
HDH_T24701	16.5986	-2.29731	0.766332	-2.9978	0.00271932	0.026559
HDH_T22142	17.3282	-3.44647	1.1494	-2.99849	0.0027132	0.026559
HDH_T23839	10.4961	-4.14557	1.38455	-2.99417	0.00275193	0.0268275
HDH_T22452	10.2282	-6.65974	2.22567	-2.99224	0.00276941	0.0269477
HDH_T29946	199.272	1.12218	0.375164	2.99117	0.00277912	0.0269921
HDH_T04328	13.9156	3.10513	1.03832	2.99053	0.00278495	0.0269986
HDH_T07726	181.366	1.25001	0.418223	2.98886	0.00280024	0.0270966
HDH_T30349	5.14073	-5.66285	1.8974	-2.98453	0.00284018	0.0273004
HDH_T19123	334.524	1.24741	0.417876	2.98512	0.00283469	0.0273004
HDH_T28033	30.4904	-1.93784	0.649184	-2.98504	0.00283537	0.0273004
HDH_T20798	170.269	1.29228	0.433024	2.98431	0.00284216	0.0273004
HDH_T03629	491.632	1.26803	0.425149	2.98256	0.0028585	0.0274071
HDH_T08928	3.88467	5.59153	1.87581	2.98086	0.00287445	0.0275096
HDH_T26237	4.17426	-5.36913	1.80289	-2.97806	0.00290077	0.027649
HDH_T01573	1103.52	1.22182	0.410181	2.97874	0.00289441	0.027649
HDH_T00959	280.11	1.34565	0.451921	2.97763	0.00290486	0.027649
HDH_T15988	305.155	1.23899	0.416199	2.97692	0.00291156	0.0276625
HDH_T27336	77.7678	1.44202	0.485038	2.973	0.002949	0.0278466
HDH_T27767	4.5711	-5.49322	1.84858	-2.97159	0.0029626	0.0278466
HDH_T30990	4.61501	-5.50904	1.85371	-2.9719	0.00295961	0.0278466
HDH_T16264	11.8618	-2.95603	0.994773	-2.97157	0.00296285	0.0278466
HDH_T07419	323.395	1.49396	0.502354	2.97393	0.00294014	0.0278466
HDH_T06945	4.13991	5.68288	1.91157	2.97289	0.0029501	0.0278466
HDH_T01621	5.58043	-5.78135	1.94746	-2.96866	0.00299102	0.0280609
HDH_T21703	4.51957	-5.47757	1.84641	-2.9666	0.00301113	0.028199
HDH_T25458	4.05642	-5.33072	1.79756	-2.96553	0.00302161	0.0282466
HDH_T13898	8.11853	-3.41296	1.1519	-2.96289	0.00304766	0.0284394
HDH_T23995	36.3077	1.42737	0.48209	2.9608	0.00306839	0.0285819
HDH_T24771	13.6595	-3.18822	1.0773	-2.95945	0.00308191	0.0286568
HDH_T08835	67.1702	-1.46537	0.495691	-2.95621	0.0031144	0.0288565
HDH_T13775	3.93671	5.61462	1.89901	2.9566	0.00311046	0.0288565
HDH_T04851	5.70707	-5.81437	1.96782	-2.95472	0.00312949	0.0289007
HDH_T06708	86.6872	-1.33962	0.453395	-2.95465	0.00313022	0.0289007
HDH_T23126	47.4743	-2.47527	0.838126	-2.95333	0.00314363	0.0289225
HDH_T12327	4.43815	-5.46616	1.85054	-2.95382	0.00313869	0.0289225
HDH_T06040	61.3648	1.49997	0.508487	2.94987	0.00317911	0.0291977
HDH_T17977	397.611	1.60524	0.544784	2.94657	0.00321319	0.029459
HDH_T02416	459.018	1.05535	0.35831	2.94536	0.00322581	0.0294714
HDH_T11764	4.69117	-5.53169	1.87781	-2.94583	0.00322093	0.0294714
HDH_T30357	251.982	1.43803	0.48854	2.94353	0.00324493	0.0294937
HDH_T16013	12.9618	3.19419	1.08516	2.94351	0.00324515	0.0294937
HDH_T11355	20.403	-1.90933	0.648473	-2.94436	0.00323628	0.0294937
HDH_T22280	6.09698	4.48189	1.52339	2.94204	0.00326053	0.0295821
HDH_T27904	11.4798	-2.62941	0.895931	-2.93484	0.00333722	0.0302255
HDH_T04783	36.1517	-1.7486	0.596051	-2.93365	0.00335004	0.0302892
HDH_T31121	248.291	1.75649	0.599547	2.9297	0.00339291	0.0306239
HDH_T02715	17.7813	-3.00833	1.02791	-2.92665	0.00342638	0.0308198
HDH_T02566	200.208	1.33125	0.454802	2.92711	0.0034213	0.0308198
HDH_T01191	4.3414	-5.41983	1.85237	-2.92589	0.00343475	0.030842
HDH_T27894	11.7662	-3.30706	1.13093	-2.92419	0.0034535	0.0309573
HDH_T29021	67.7923	-1.65173	0.565179	-2.92249	0.00347241	0.0310736
HDH_T15040	107.937	2.28007	0.7811	2.91906	0.00351094	0.031204
HDH_T12177	15.9047	-3.50967	1.20215	-2.91949	0.00350608	0.031204
HDH_T25329	4.40606	-5.44019	1.8628	-2.92044	0.00349539	0.031204
HDH_T13511	4.05149	-5.32902	1.82644	-2.9177	0.00352619	0.0312345
HDH_T01512	67.063	1.38552	0.475165	2.91586	0.00354705	0.0313662
HDH_T02943	8.00066	-4.29272	1.47265	-2.91497	0.00355724	0.0314033
HDH_T11280	68.1682	-1.00683	0.345467	-2.91439	0.00356383	0.0314085
HDH_T28756	8.03959	6.63959	2.28304	2.90822	0.0036349	0.031981
HDH_T11886	4.57931	-5.49619	1.8903	-2.90758	0.00364236	0.0319929
HDH_T21676	182.988	-1.66232	0.57192	-2.90655	0.00365433	0.0319983
HDH_T26898	24.7457	-2.26325	0.778692	-2.90648	0.0036552	0.0319983
HDH_T03857	4.91923	-5.60008	1.92778	-2.90494	0.00367327	0.0320729
HDH_T21699	4.63412	-5.51275	1.89854	-2.90368	0.00368807	0.0320729
HDH_T04854	11.5647	-2.41626	0.832141	-2.90366	0.00368823	0.0320729
HDH_T23473	4.17964	-5.36482	1.84702	-2.90457	0.00367753	0.0320729
HDH_T09965	5.15929	-4.65445	1.60362	-2.90246	0.00370239	0.0321427
HDH_T00928	10.7467	-4.95519	1.70837	-2.90053	0.00372527	0.0322878
HDH_T24843	5.48102	6.08936	2.10125	2.89796	0.00375597	0.0322948
HDH_T06937	66.1074	1.24919	0.430774	2.89987	0.00373319	0.0322948
HDH_T20872	4.18128	-5.36539	1.85149	-2.89788	0.00375693	0.0322948
HDH_T07971	4.21771	-5.39202	1.86002	-2.8989	0.00374472	0.0322948
HDH_T28319	4.76166	-5.56543	1.92047	-2.89796	0.00375602	0.0322948
HDH_T17481	4.87996	-5.59503	1.93192	-2.8961	0.00377835	0.0324257
HDH_T20976	4.05419	-5.3266	1.84036	-2.89432	0.00379982	0.0325566
HDH_T17236	151.879	1.40211	0.484671	2.8929	0.00381703	0.0326027
HDH_T13248	12.9707	-3.61228	1.24869	-2.89285	0.00381766	0.0326027
HDH_T28347	5.24051	-5.6906	1.9684	-2.89098	0.00384045	0.0327439
HDH_T19881	17.1191	-2.36565	0.818635	-2.88975	0.00385544	0.0328183
HDH_T16498	65.3011	-1.17674	0.407301	-2.88912	0.0038632	0.0328309
HDH_T23769	3.88974	-5.27085	1.82592	-2.88668	0.00389334	0.0330335
HDH_T09108	11.9653	-3.49463	1.2126	-2.88194	0.00395239	0.0334802
HDH_T12468	16.2079	-2.88295	1.0006	-2.88121	0.00396154	0.0335035
HDH_T11816	92.5259	1.59249	0.552936	2.88006	0.00397602	0.0335717
HDH_T15423	17.2901	-2.75756	0.958131	-2.87806	0.00400123	0.0336043
HDH_T27147	6.50253	-4.99599	1.73609	-2.87772	0.00400555	0.0336043
HDH_T01101	10.858	-3.66187	1.27233	-2.87809	0.00400087	0.0336043
HDH_T19628	4.58095	-5.49691	1.91016	-2.87773	0.00400548	0.0336043
HDH_T06021	138.947	1.4794	0.514388	2.87604	0.00402703	0.0336386
HDH_T19444	4.23446	-5.38299	1.87177	-2.87589	0.00402892	0.0336386
HDH_T28757	7.52546	6.54447	2.27518	2.87646	0.00402162	0.0336386
HDH_T18900	85.879	1.341	0.466423	2.87506	0.00403946	0.0336729
HDH_T19456	3.49839	5.44105	1.89357	2.87344	0.00406032	0.0337788
HDH_T21478	5.25364	-5.6942	1.98192	-2.87307	0.00406507	0.0337788
HDH_T02448	100.579	1.42719	0.497449	2.86902	0.00411748	0.0341601
HDH_T29103	13.6873	-2.46378	0.85895	-2.86836	0.00412608	0.0341773
HDH_T03105	4.68894	-5.52948	1.9295	-2.86576	0.00416014	0.0344011
HDH_T16305	4.63741	-5.51406	1.92542	-2.86383	0.00418553	0.0344517
HDH_T28605	27.8555	-1.80373	0.630226	-2.86204	0.0042092	0.0345921
HDH_T09461	32.0415	-2.40799	0.842074	-2.85959	0.0042419	0.0347998
HDH_T27613	12.9309	-3.62261	1.26702	-2.85915	0.00424777	0.0347998
HDH_T06698	4.69445	-5.53327	1.93721	-2.85631	0.00428596	0.0350578
HDH_T05317	3.77787	-5.22808	1.83134	-2.85477	0.00430674	0.035118
HDH_T10593	3.83703	-5.24522	1.83708	-2.8552	0.004301	0.035118
HDH_T01082	4.01132	-5.30568	1.85956	-2.85318	0.00432836	0.0352394
HDH_T20455	17.5323	2.18352	0.765564	2.85217	0.00434217	0.035297
HDH_T21864	36.8859	-2.0091	0.704574	-2.85151	0.00435122	0.0353157
HDH_T08281	124.618	-1.50632	0.528441	-2.85051	0.00436498	0.0353725
HDH_T30448	14.3947	-2.57795	0.905484	-2.84704	0.0044128	0.0356439
HDH_T15332	11.0735	-3.24606	1.14033	-2.8466	0.0044189	0.0356439
HDH_T06802	70.7189	-1.09938	0.386105	-2.84737	0.00440819	0.0356439
HDH_T23497	17.1822	-2.01366	0.707732	-2.84522	0.00443802	0.0357431
HDH_T15683	35.7271	-2.11946	0.745601	-2.84262	0.00447443	0.035981
HDH_T26092	64.3129	1.5173	0.533969	2.84155	0.00448949	0.0360468
HDH_T31192	10.5768	-3.91187	1.37705	-2.84077	0.00450051	0.0360799
HDH_T05492	14.449	-2.86468	1.00896	-2.83925	0.00452203	0.036197
HDH_T00885	31.4774	-1.5429	0.544076	-2.83581	0.00457098	0.0363685
HDH_T22912	5.45471	-4.73193	1.66893	-2.83531	0.00457819	0.0363685
HDH_T12111	4.63905	-5.51478	1.94472	-2.83577	0.00457159	0.0363685
HDH_T07297	1220.13	2.65843	0.93723	2.83648	0.00456142	0.0363685
HDH_T14562	4.16723	-5.37258	1.89381	-2.83691	0.0045552	0.0363685
HDH_T08443	18.2556	-1.87075	0.660648	-2.83169	0.00463022	0.0367261
HDH_T01251	3.78549	-5.22697	1.84621	-2.83119	0.00463757	0.0367287
HDH_T17483	12.5815	-4.61531	1.63176	-2.82842	0.0046778	0.0368799
HDH_T11683	4.06942	-5.32562	1.8827	-2.82872	0.00467343	0.0368799
HDH_T23725	54.0016	1.21831	0.43064	2.82908	0.00466826	0.0368799
HDH_T06413	9.06796	-6.48588	2.29442	-2.8268	0.00470152	0.0370112
HDH_T04027	4.71598	-5.54402	1.96187	-2.82589	0.00471491	0.0370609
HDH_T10636	3.73735	5.53601	1.96021	2.8242	0.00473992	0.0372016
HDH_T18857	57.4052	1.47815	0.523782	2.82206	0.00477159	0.0372825
HDH_T14747	48.9134	1.64563	0.583014	2.82263	0.00476313	0.0372825
HDH_T30992	7.5039	-4.19319	1.48586	-2.82206	0.00477155	0.0372825
HDH_T12933	33.1893	1.40447	0.497854	2.82106	0.00478659	0.037344
HDH_T07920	4.52226	-5.4772	1.94223	-2.82006	0.00480142	0.0374039
HDH_T00540	28.7225	1.76677	0.626983	2.81789	0.00483402	0.037602
HDH_T19131	3.72142	-5.20785	1.84874	-2.81696	0.00484801	0.0376548
HDH_T08827	2708.59	1.07543	0.38198	2.81542	0.00487133	0.0377347
HDH_T00951	15.8531	-2.03962	0.724471	-2.81533	0.00487271	0.0377347
HDH_T20447	6.9884	-4.28556	1.52268	-2.81448	0.00488568	0.0377792
HDH_T04519	7.55708	-4.20242	1.49367	-2.81348	0.00490083	0.0378405
HDH_T04414	8.14841	-6.3345	2.25347	-2.811	0.00493873	0.0380769
HDH_T09027	21.449	-3.73084	1.32783	-2.80973	0.00495837	0.0381721
HDH_T19926	4.90387	-5.5947	1.992	-2.80859	0.00497593	0.038195
HDH_T28068	13.1862	-3.92989	1.39912	-2.80883	0.00497224	0.038195
HDH_T09183	12.5621	-3.57484	1.27304	-2.80811	0.00498338	0.0381962
HDH_T21481	4.51241	-5.47434	1.94988	-2.80752	0.00499244	0.0382097
HDH_T13265	11.8504	-3.16313	1.12772	-2.80489	0.00503331	0.0384246
HDH_T04467	9.84641	-2.83079	1.00945	-2.8043	0.00504254	0.0384246
HDH_T07320	62.6017	-1.4776	0.526859	-2.80455	0.00503866	0.0384246
HDH_T23174	12.4482	-2.21331	0.789881	-2.80209	0.00507732	0.0386334
HDH_T12837	173.563	1.02689	0.366838	2.79931	0.00512125	0.038898
HDH_T17143	23.1653	-2.80468	1.00205	-2.79895	0.00512696	0.038898
HDH_T09054	10.0866	2.87901	1.0288	2.79841	0.00513554	0.0389067
HDH_T19199	3.88587	-5.26602	1.88351	-2.79585	0.00517639	0.0391031
HDH_T28224	12.9442	-3.62293	1.29572	-2.79607	0.00517285	0.0391031
HDH_T30677	18.4942	1.83971	0.658276	2.79473	0.00519423	0.0391812
HDH_T26837	4.12752	-5.34552	1.91482	-2.79166	0.00524389	0.039499
HDH_T03118	106.278	-1.53322	0.549499	-2.79021	0.00526737	0.0396188
HDH_T02510	2431.37	1.32059	0.473888	2.78671	0.00532461	0.0399919
HDH_T10988	37.7529	2.60752	0.936133	2.78541	0.00534593	0.0400945
HDH_T20383	104.978	1.41756	0.509434	2.78262	0.00539226	0.0403841
HDH_T11372	4.32347	-5.42242	1.94933	-2.78169	0.00540773	0.0404421
HDH_T28297	4.35394	-5.42238	1.94988	-2.78088	0.00542111	0.0404844
HDH_T21665	53.8428	1.12042	0.403132	2.77929	0.00544772	0.0406251
HDH_T25002	45.3642	-1.42088	0.511905	-2.77567	0.00550883	0.0406752
HDH_T08686	10.0747	-2.41438	0.86978	-2.77585	0.00550571	0.0406752
HDH_T00447	4.70798	-4.53492	1.63373	-2.77581	0.00550649	0.0406752
HDH_T19659	4.74868	-5.54797	1.99828	-2.77638	0.00549684	0.0406752
HDH_T02246	69.9965	1.07048	0.385388	2.77767	0.00547498	0.0406752
HDH_T00501	16.3317	-1.93851	0.697878	-2.77772	0.00547419	0.0406752
HDH_T14740	32.8686	-2.87262	1.03461	-2.77651	0.00549452	0.0406752
HDH_T20990	13.9978	-2.89125	1.04251	-2.77336	0.0055481	0.0409075
HDH_T09472	3.61225	-5.16017	1.86138	-2.77223	0.00556732	0.0409915
HDH_T21200	15.8735	-2.50561	0.904246	-2.77094	0.00558953	0.0410135
HDH_T31066	8.67371	-4.62993	1.67112	-2.77056	0.00559608	0.0410135
HDH_T12761	4.12095	-5.34357	1.92924	-2.76978	0.00560949	0.0410135
HDH_T13274	4.12095	-5.34357	1.92924	-2.76978	0.00560949	0.0410135
HDH_T05010	9.07617	-6.48734	2.34165	-2.77041	0.00559862	0.0410135
HDH_T14730	447.849	1.01173	0.365358	2.76914	0.00562048	0.0410366
HDH_T28227	10.3694	-2.91314	1.05376	-2.76452	0.00570063	0.0415638
HDH_T08430	4.7156	-4.53314	1.64063	-2.76305	0.00572643	0.0416939
HDH_T00350	1088.25	1.5561	0.563646	2.76078	0.00576634	0.0418426
HDH_T27638	9.94497	3.87397	1.40298	2.76124	0.00575816	0.0418426
HDH_T17411	6.01379	-4.88886	1.77099	-2.76053	0.00577085	0.0418426
HDH_T26228	1071.84	1.5686	0.568332	2.76	0.00578015	0.0418521
HDH_T23311	81.749	1.7123	0.620913	2.75771	0.00582074	0.0419568
HDH_T13667	3.55579	-5.13901	1.86373	-2.75738	0.00582667	0.0419568
HDH_T01948	4.35722	-5.42363	1.96738	-2.75677	0.00583745	0.0419767
HDH_T06539	589.586	1.01098	0.366786	2.75632	0.00584565	0.041978
HDH_T17476	8.59771	-2.5363	0.920398	-2.75566	0.00585741	0.0420049
HDH_T23366	8.51939	-3.75047	1.36143	-2.7548	0.00587289	0.0420582
HDH_T10986	49.892	2.12284	0.770828	2.75397	0.00588774	0.0420953
HDH_T28187	385.731	1.15323	0.418805	2.75361	0.00589414	0.0420953
HDH_T25698	3.78878	-5.22828	1.90008	-2.75161	0.00593037	0.0422963
HDH_T16998	22.3327	1.7858	0.649315	2.75029	0.00595433	0.0423518
HDH_T20305	4.11931	-5.3432	1.94256	-2.7506	0.0059486	0.0423518
HDH_T01492	84.5605	1.93436	0.703967	2.7478	0.00599963	0.0426161
HDH_T22321	9.23163	-3.03174	1.10353	-2.7473	0.00600876	0.0426231
HDH_T12680	3.71919	-5.20331	1.89482	-2.74607	0.00603133	0.0427253
HDH_T05528	7.30287	-3.75824	1.36997	-2.7433	0.00608248	0.0430294
HDH_T29622	98.7095	1.40349	0.51185	2.74199	0.00610678	0.043143
HDH_T16898	4.58154	-5.50006	2.00624	-2.74147	0.00611651	0.0431535
HDH_T04785	12.2748	2.96568	1.08205	2.74081	0.00612888	0.0431826
HDH_T04799	79.6232	-1.22927	0.448618	-2.74013	0.00614149	0.0432133
HDH_T25506	44.5805	-1.53077	0.558947	-2.73866	0.00616899	0.0433486
HDH_T09100	155.078	1.34628	0.491744	2.73777	0.00618565	0.0434074
HDH_T26509	3.67468	-5.17971	1.893	-2.73625	0.00621442	0.0434184
HDH_T25584	59.7184	2.17034	0.793274	2.73593	0.00622039	0.0434184
HDH_T00901	7.86492	-4.32616	1.58079	-2.73671	0.00620573	0.0434184
HDH_T00627	10.3693	-3.58231	1.30894	-2.73681	0.00620385	0.0434184
HDH_T19014	14.27	-2.77476	1.0155	-2.73241	0.00628728	0.0438268
HDH_T22046	7.41639	-6.19913	2.26953	-2.73146	0.00630545	0.043895
HDH_T28326	82.906	1.41025	0.51661	2.72982	0.00633696	0.0440558
HDH_T28586	15.4124	-2.74125	1.00477	-2.72824	0.00636727	0.0441492
HDH_T27765	3.67304	-5.17922	1.90202	-2.72301	0.00646909	0.0445601
HDH_T00825	3.67304	-5.17922	1.90202	-2.72301	0.00646909	0.0445601
HDH_T23554	3.90767	-5.2675	1.9344	-2.72307	0.00646785	0.0445601
HDH_T00407	7.14013	-3.18589	1.16934	-2.72452	0.00643959	0.0445601
HDH_T30598	3.67304	-5.17922	1.90202	-2.72301	0.00646909	0.0445601
HDH_T29748	24.3931	1.73508	0.637382	2.72219	0.006485	0.0445816
HDH_T11892	4.23892	-5.3904	1.98033	-2.72198	0.00648924	0.0445816
HDH_T03303	73.2937	-2.66547	0.979973	-2.71995	0.00652927	0.0447978
HDH_T19795	12.4973	-3.5702	1.31284	-2.71944	0.0065393	0.0448079
HDH_T20850	11.1208	-2.76975	1.01903	-2.71802	0.00656737	0.0449414
HDH_T11185	35.0974	-2.11068	0.776964	-2.71658	0.00659609	0.0450202
HDH_T26990	80.8075	-1.0463	0.385338	-2.71528	0.00662193	0.0450401
HDH_T17056	3.73606	-5.20253	1.91612	-2.71514	0.00662482	0.0450401
HDH_T13899	4.88804	-5.59257	2.0592	-2.71589	0.00660975	0.0450401
HDH_T11360	3.73114	-5.20078	1.91592	-2.7145	0.00663756	0.0450682
HDH_T05244	7.76942	3.03719	1.12246	2.70583	0.00681332	0.0460975
HDH_T00777	16.0126	-2.79409	1.03266	-2.70572	0.00681556	0.0460975
HDH_T30835	180.907	-1.31178	0.484762	-2.70602	0.00680945	0.0460975
HDH_T30426	33.1827	-2.11619	0.783242	-2.70184	0.00689569	0.0465192
HDH_T30833	11.0255	2.73765	1.0132	2.70198	0.00689286	0.0465192
HDH_T02247	6.49388	-4.18064	1.54932	-2.69837	0.00696797	0.0468371
HDH_T03620	4.17577	-5.36258	1.9874	-2.69829	0.00696965	0.0468371
HDH_T22667	7.2225	-3.75344	1.39086	-2.69865	0.00696211	0.0468371
HDH_T18267	7.04986	-6.12926	2.27689	-2.69194	0.0071038	0.047602
HDH_T24772	6.54562	-3.0228	1.12305	-2.69161	0.00711075	0.047602
HDH_T20527	3.50038	-5.11395	1.89945	-2.69233	0.00709551	0.047602
HDH_T07995	77.7293	1.4248	0.529718	2.68974	0.00715076	0.0478087
HDH_T06623	61.2133	1.22521	0.455646	2.68894	0.00716784	0.0478618
HDH_T07163	4.01894	-5.30673	1.97389	-2.68847	0.00717812	0.0478694
HDH_T10442	14.7642	-2.22005	0.826107	-2.68736	0.007202	0.0479675
HDH_T19424	19.3008	-2.63859	0.982206	-2.68639	0.00722278	0.0480448
HDH_T02720	36.3476	2.47984	0.924514	2.68231	0.00731148	0.0485731
HDH_T27484	3.79416	-5.22409	1.9481	-2.68163	0.00732642	0.0486106
HDH_T18862	3.90661	-5.27036	1.96641	-2.68019	0.00735806	0.0487588
HDH_T20076	156.845	-1.17737	0.439864	-2.67666	0.00743604	0.0491105
HDH_T24370	6.04045	-4.06579	1.51906	-2.67651	0.00743929	0.0491105
HDH_T29545	7.09458	-6.13479	2.29434	-2.67388	0.00749784	0.0494347
HDH_T20411	21.4663	-2.00302	0.749388	-2.67287	0.00752051	0.0494597
HDH_T08322	7.85578	-3.70692	1.38675	-2.67311	0.00751518	0.0494597
HDH_T07946	30.3297	-3.38516	1.26681	-2.67219	0.00753569	0.0494973
HDH_T20448	4.24044	-5.38422	2.01589	-2.67088	0.00756523	0.0495669
HDH_T16242	122.644	1.26166	0.472514	2.6701	0.00758288	0.0496205
HDH_T03043	28.785	-2.71858	1.01894	-2.66806	0.00762906	0.0497605
HDH_T13359	176.791	1.7274	0.647436	2.66806	0.00762905	0.0497605
HDH_T11828	51.446	-1.4511	0.544397	-2.66552	0.00768702	0.0498039
HDH_T20473	29.0912	-1.97516	0.740807	-2.66623	0.00767073	0.0498039
HDH_T20676	3.5661	-5.13551	1.92644	-2.6658	0.00768049	0.0498039
HDH_T03002	5.90733	3.86647	1.45022	2.66613	0.00767303	0.0498039
HDH_T08890	22.3959	1.62371	0.609131	2.66562	0.00768457	0.0498039
